# Supplementary material for: Temperature variability increases Trypanosoma cruzi load but not the extrinsic incubation period in Triatoma infestans
Source: Research Square preprint supplement (doi:10.21203/rs.3.rs-7881049/v1), 2025-11-03
Supplement: Supplementary file 1 [file 3d532847d7c3d28d6cea0aff.docx]

**Supplementary material**

**Table S1**. Model selection for GLM models of *Trypanosoma cruzi* EIP in *Triatoma infestans* acclimated to four temperature treatments that differed in temperature mean and temperature variability.

| **Models for EIP** | **df** | **LRT** | **AIC** |
| --- | --- | --- | --- |
| ~ T+ Pm + bi + mb + bi x mb | 9 | - | 700.33 |
| ~ T + bi + mb + bi x mb | 8 | 0.9733 | 698.34* |
| ~ T+ bi + mb | 7 | < 0.01 | 708.33 |
| ~ bi + mb + bi x mb | 5 | < 0.01 | 725.00 |
| ~ T | 5 | < 0.01 | 722.41 |

GLM: Generalized linear model; EIP: Extrinsic incubation period; df: degrees of freedom; LRT: likelihood ratio test; AIC: Akaike's information criterion; T: Temperature treatments; Pm: mouse parasitemia; bi: ingested blood; mb: body mass before infection. * selected model.

**Table S2**. Tukey test for EIP GLM model

|  | Estimate | Std. Error | z value | p |
| --- | --- | --- | --- | --- |
| 18V - 18C | 0.005 | 0.007 | 0.632 | 0.580 |
| 27C - 18C | 0.050 | 0.011 | 4.525 | < 0.001 |
| 27V - 18C | 0.037 | 0.010 | 3.819 | < 0.001 |
| 27C - 18V | 0.045 | 0.011 | 3.994 | < 0.001 |
| 27V - 18V | 0.032 | 0.010 | 3.214 | < 0.005 |
| 27V - 27C | -0.013 | 0.012 | -1.058 | 0.580 |

**Table S3.** Model selection for GAM models of *T. cruzi* parasitic load in *Triatoma infestans* acclimated to four temperature treatments that differed in temperature mean and temperature variability. The one in bold is the selected model.

| GAM models for parasitic load | df | AIC |
| --- | --- | --- |
| ~ T + s(ID) + s(Days, by = T) + te(mb, bi, by = T) + Pm | 46.632 | 1452.900 |
| ~ T + s(ID+ s(Days, by = T) + te(mb, by =T) | 45.858 | 1448.647 * |
| ~ s (ID) + s(Days, by=T) + te(mb, bi, by =T) | 53.985 | 1482.309 |
| ~ T+ s (ID)+ s(Days, by=T) + te(mb, bi) | 34.610 | 1421.588 |
| ~ T + s(ID)+ s(Days) + te(mb, bi, by= T) | 34.750 | 1426.263 |
| ~ T + s(ID)+ s(Days) + te(mb, bi) | 33.889 | 1554.681 |
| ~ T + s(ID)+ s(Days) + te(mb, bi, by= T) | 38.313 | 1323.659 |
| ~ T + s(ID)+ Days + te(mb, bi, by = T | 33.889 | 1428.384 |
| ~ T + s(ID, + s(Days, by = T) + s(mb, by = T) + s(bi, by = T) + Pm | 52.028 | 1286.549 |
| ~ T + s(ID)+ s(Days, by = T) + s(mb, by = T) + s(bi, by = T) | 53.077 | 1284.569 |
| ~ s(ID,) + s(Days, by = T) + s(mb, by = T) + s(bi, by = T) | 52.847 | 1284.406 |
| ~ s(ID)+ s(Days, by = T) + s(mb) + s(bi, by = T) + Pm | 43.893 | 1296.872 |
| ~ s(ID) + s(Days, by = T) + s(mb) + s(bi, by = T) | 44.861 | 1290.069 |
| ~ s(ID)+ s(Days, by = T) + mb + s(bi, by = T) | 41.999 | 1296.056 |
| ~ s(ID ") + s(Days, by = T) + mb + s(bi) | 24.126 | 1330.877 |
| ~ s(ID) + s(Days) + s(mb, by = T) + s(bi) | 24.946 | 1319.625 |
| ~ s(ID) + s(Days, by = T) + s(mb) + s(bi) | 31.630 | 1327.146 |
| ~ T + s(ID) + s(Days, by = T) + s(bi, by = T) + Pm | 43.772 | 1304.689 |
| ~ T + s(ID) + s(Days, by = T) + Pm | 21.678 | 1357.071 |
| ~ T + s(ID)+ s(Days) + s(mb) + s(bi) + Pm | 20.094 | 1330.822 |

GAM: Generalized additive model; df: degrees of freedom, LRT: likelihood ratio test, AIC: Akaike's information criterion; T: Temperature treatment; s: spline; ID: triatomine individuals; Days: time measured as days; mb: body mass before infection; bi:  ingested blood; Pm:  mouse parasitemia.

**Table S4.** Model selection for GAMLSS models for the probability of *Trypanosoma cruzi* positive dejections in *Triatoma infestans* acclimated to four temperature treatments that differed in temperature mean and temperature variability. All modes have a random effect by individual (ID).

| GAMLSS models for positive dejections | gl | AUC | AIC |
| --- | --- | --- | --- |
| ~T * cs(Days)+random(factor(ID)) * Pm + bi*mb | 78.978 | 0.988 | 325.855 |
| ~T * cs(Days)+random(factor(ID)) * Pm + bi+ mb | 99.06 | 0.988 | 323.809 |
| ~T * cs(Days)+random(factor(ID)) + Pm + bi + mb | 99.06 | 0.988 | 323.809 |
| ~T * cs(Days)+random(factor(ID)) + bi * bmb | 99.128 | 0.988 | 323.933 |
| ~T * cs(Days)+random(factor(ID)) + Pm + bi | 98.123 | 0.988 | 321.898 |
| ~T * cs(Days)+random(factor(ID)) + bi | 97.182 | 0.988 | 320.153 |
| ~T * cs(Days)+random(factor(ID)) | 96.498 | 0.988 | 318.761* |
| ~T + cs(Days)+random(factor(ID)) | 78.978 | 0.978 | 349.802 |
| ~T + random(factor(ID)) | 6.255 | 0.691 | 528.287 |

GAMLSS: Generalized additive model for location, scale and shape; df: degrees of freedom, AUC:Area under the ROC Curve, AIC: Akaike's criterion; T: Temperature treatment; cs: cubic spline; Days: time measured as days; ID: triatomine individuals; Pm: mouse parasitemia; bi: ingested blood; mb: body mass before infection.


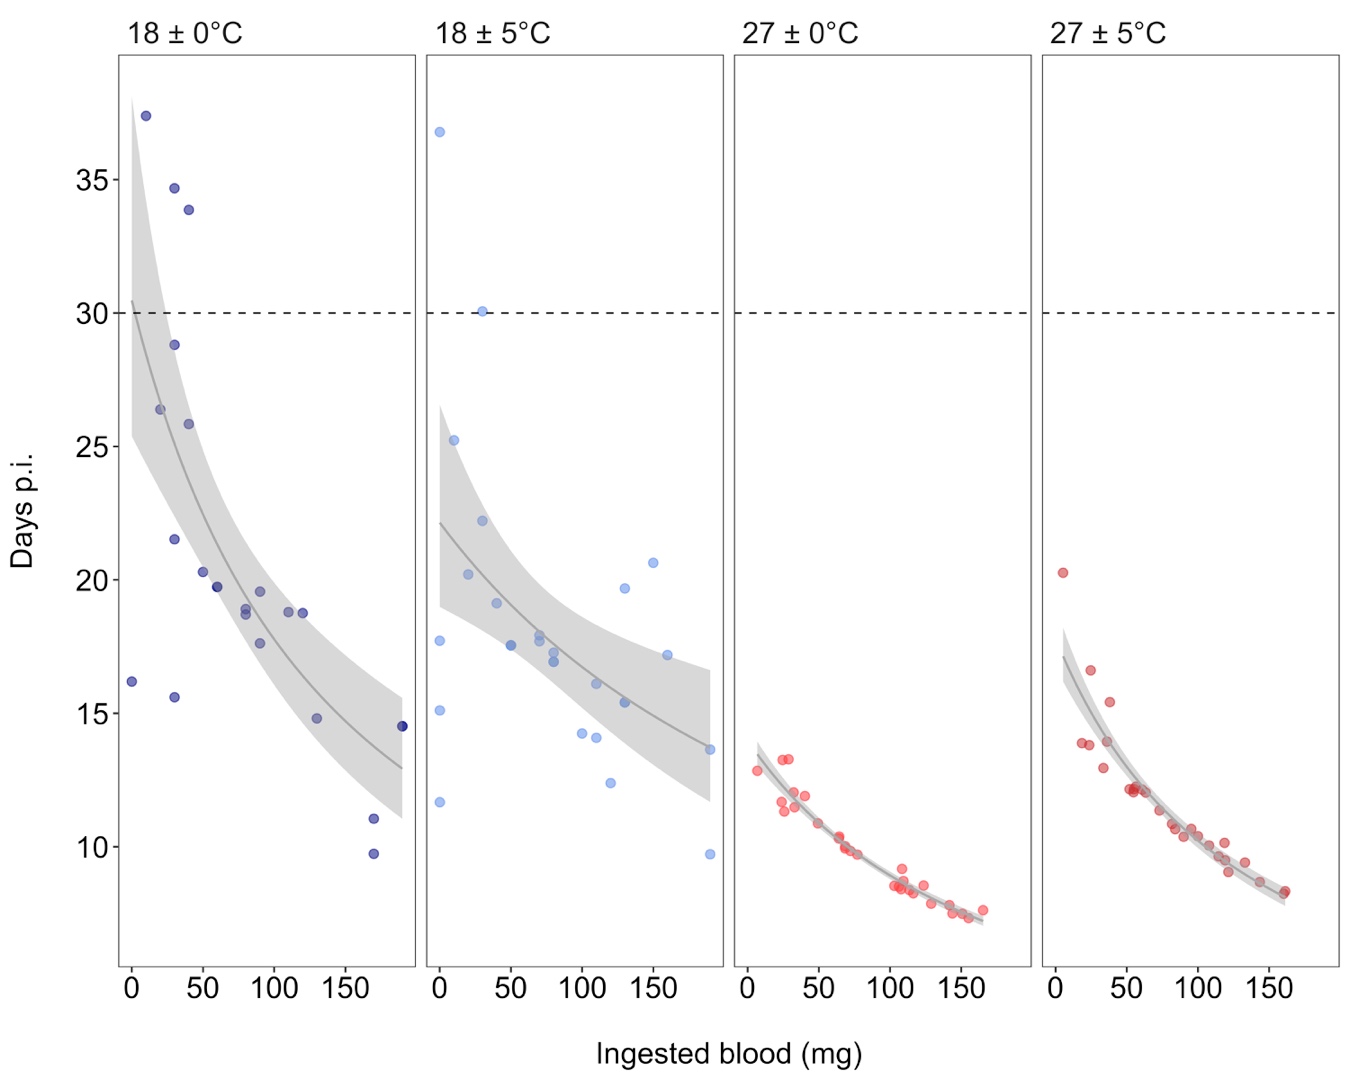


**Fig. S1.** Predicted extrinsic incubation period (EIP, in days) of *Trypanosoma cruzi* in *Triatoma infestans* as a function of ingested infective blood volume (bi, in mg), modeled using a generalized linear model (GLM). Each point represents the first positive detection of an individual. Treatments are shown in different panels: constant cold (18 ± 0 ºC, blue, n = 23), variable cold (18 ± 5 ºC, light blue, n = 28), constant warm (27 ± 0 ºC, red, n = 29), and variable warm (27 ± 5 ºC, dark red, n = 28). The shaded area indicates the standard error of the mean (s.e.m.) of the predicted EIP. Dotted horizontal lines indicate the refeeding day.

**
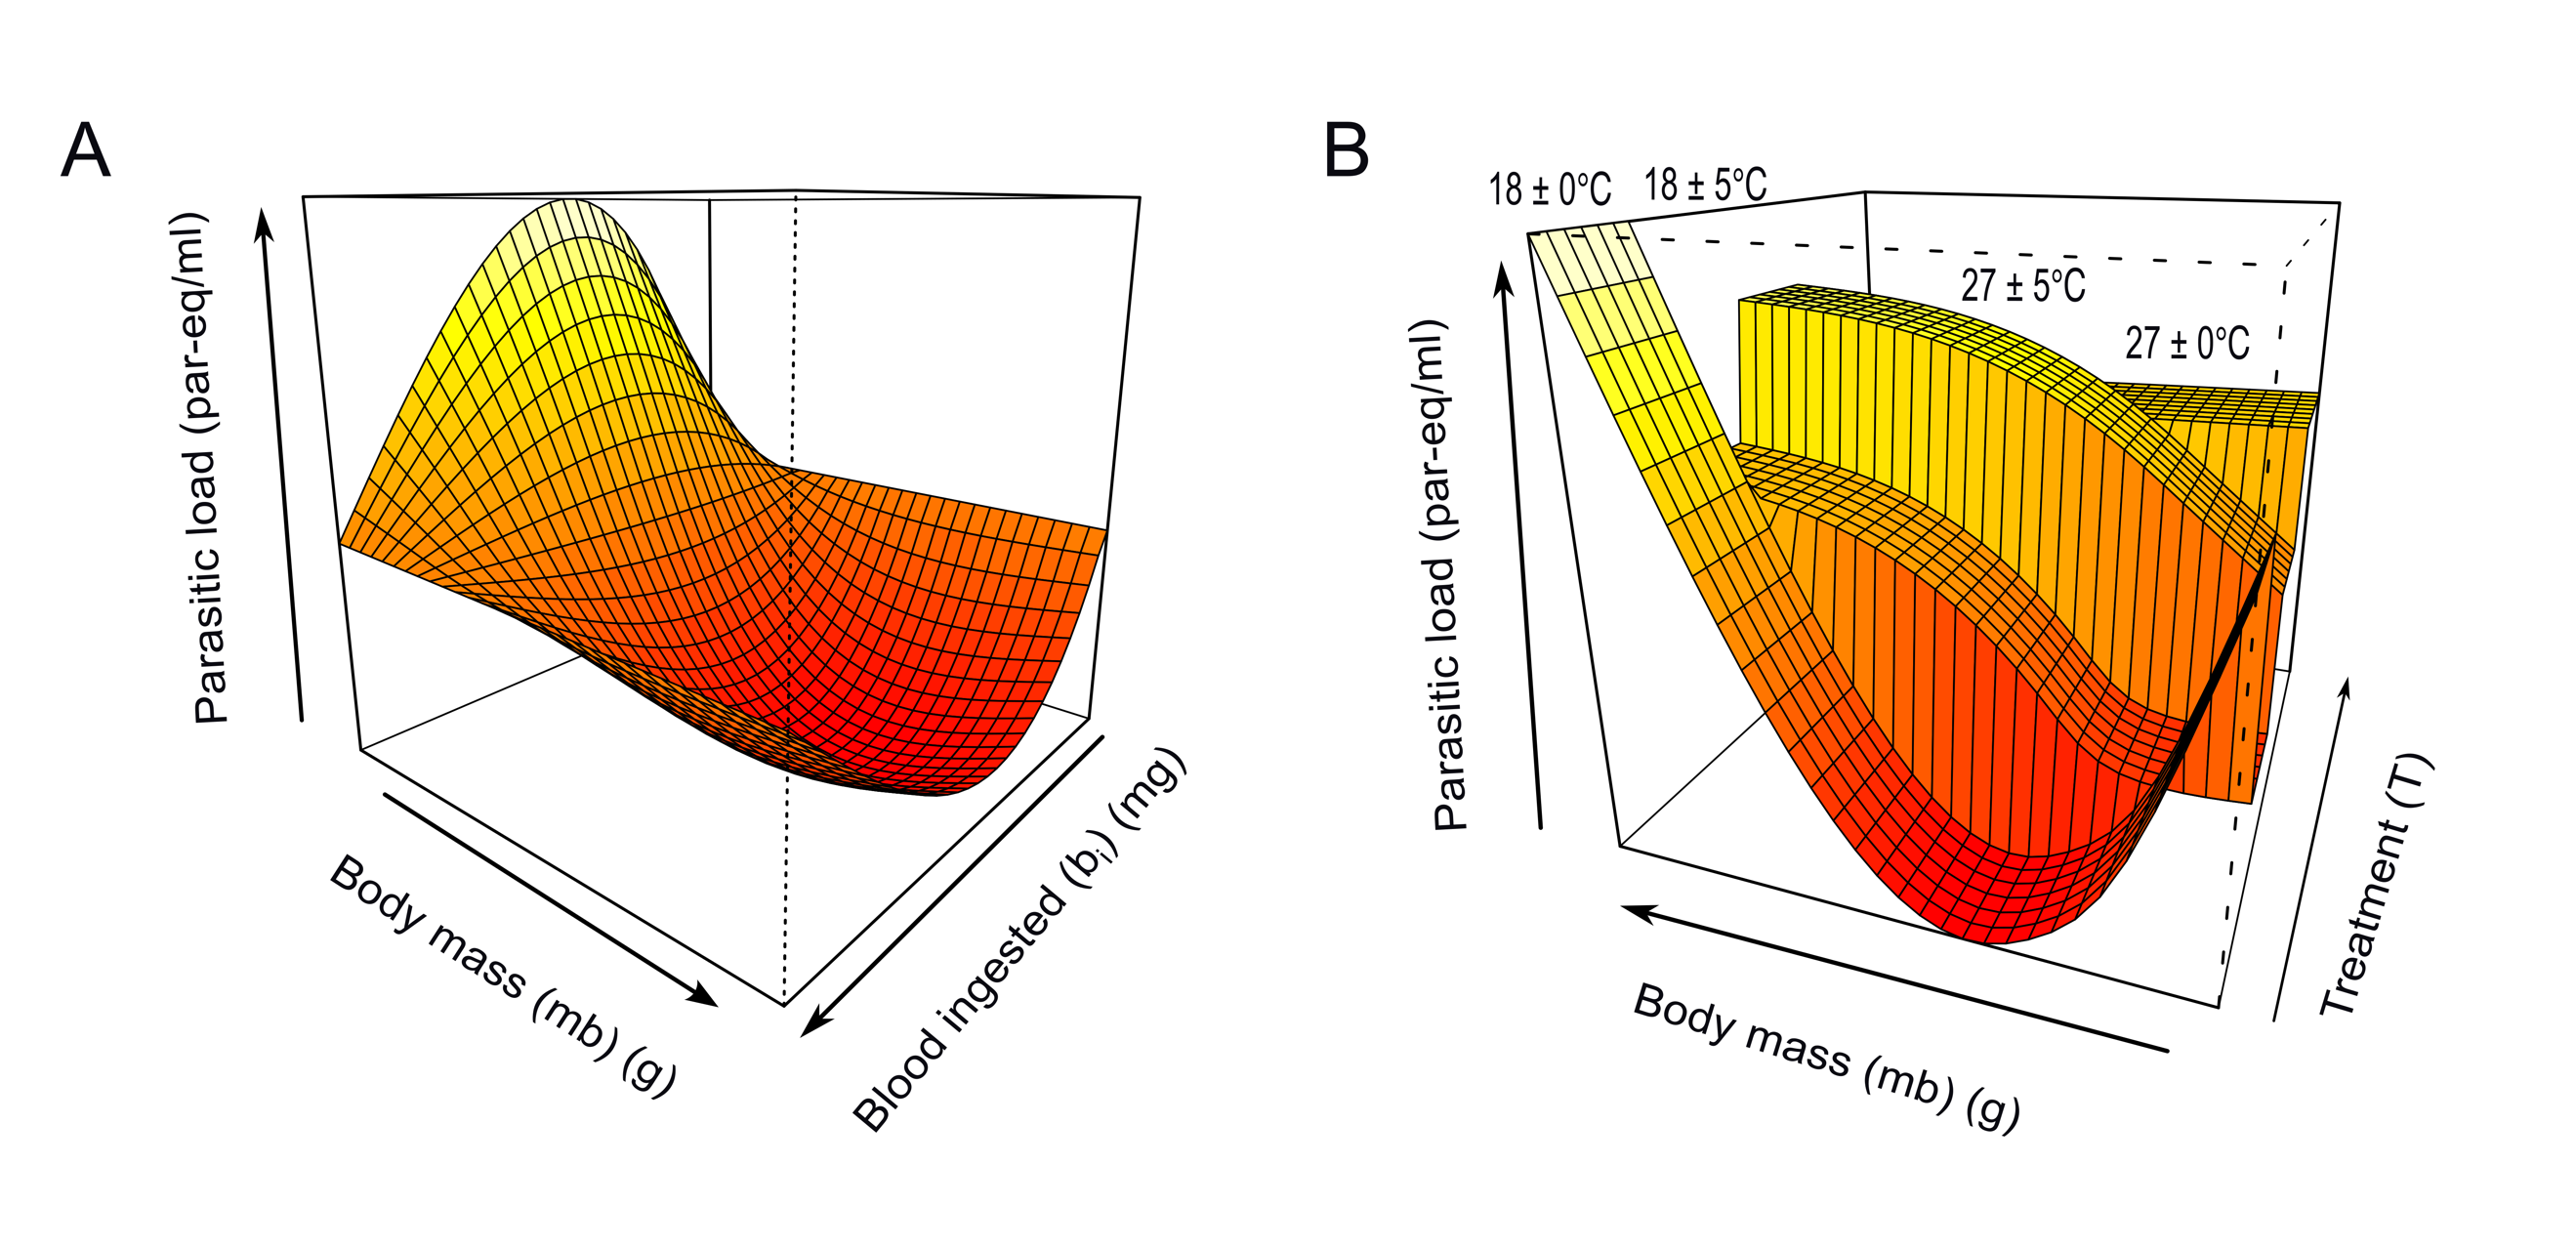
Fig. S2.** Effect of the interaction of body mass and blood ingested on parasitic load from the GAM model. mb) body mass of *T. infestans* individuals before infection in grams, bi) Blood ingested during the infection in mg.
